# Supplementary material
Source: Research Square preprint supplement (doi:10.21203/rs.3.rs-9780014/v1)
Supplement: Supplementary file 1 [file 2da20302d6ff06452d520cd7.docx]

**BODIPY with solvent polarity and viscosity sensitivity for colorimetric and fluorescent dual-mode detection of Cu2+**

Xuejian Xing a, *, Xiaolin Chen a, Meng-Die Wu a, Ning Zou a, Xiazhong Zhang a, Wenjun Zhou a, *

a College of Chemistry and Environmental Engineering, Neijiang Normal University, Neijiang 641100, Sichuan, P. R. China.

* Corresponding author; E-mail: 15367931229@163.com


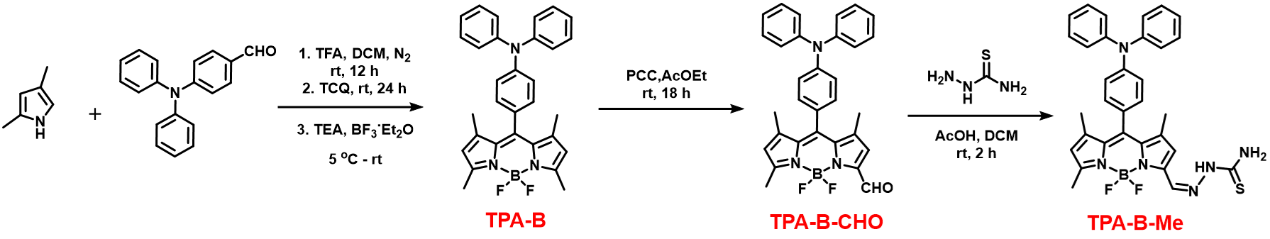


**Scheme S1**. Synthesis route of TPA-B-Me.


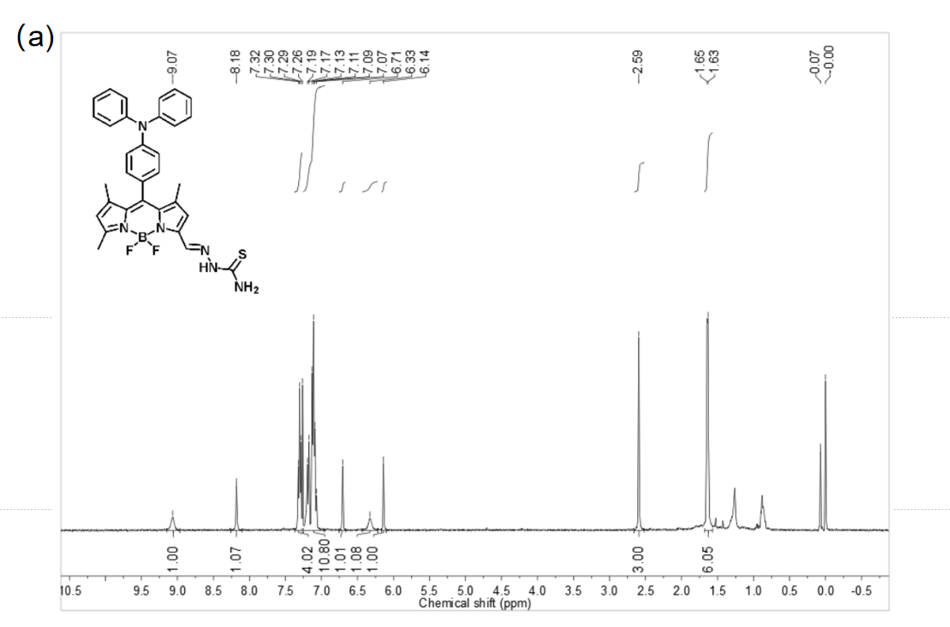


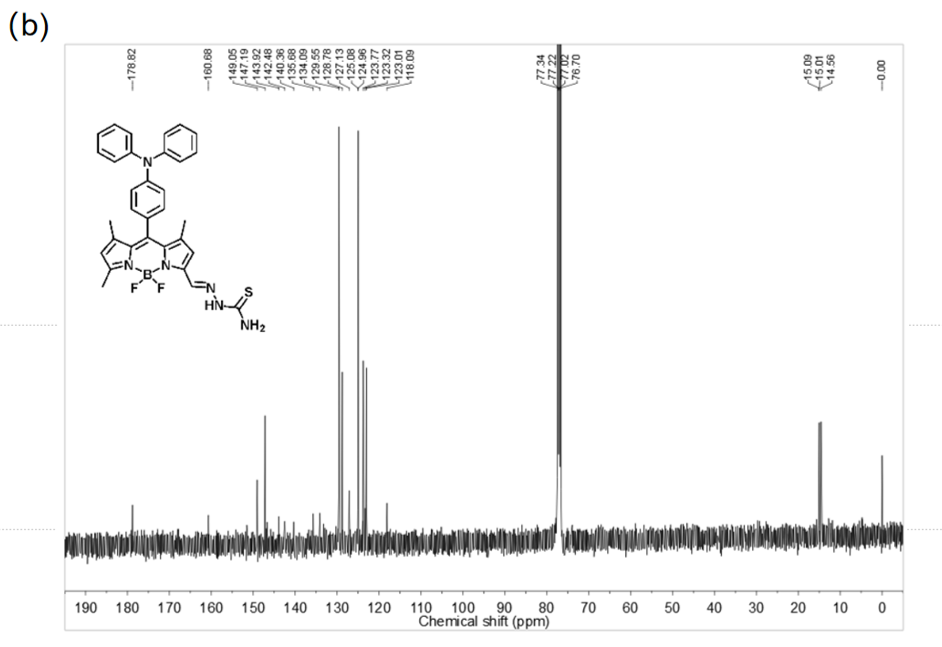


**Fig. S1**. 1H NMR (a) and 13C NMR (b) of TPA-B-Me.


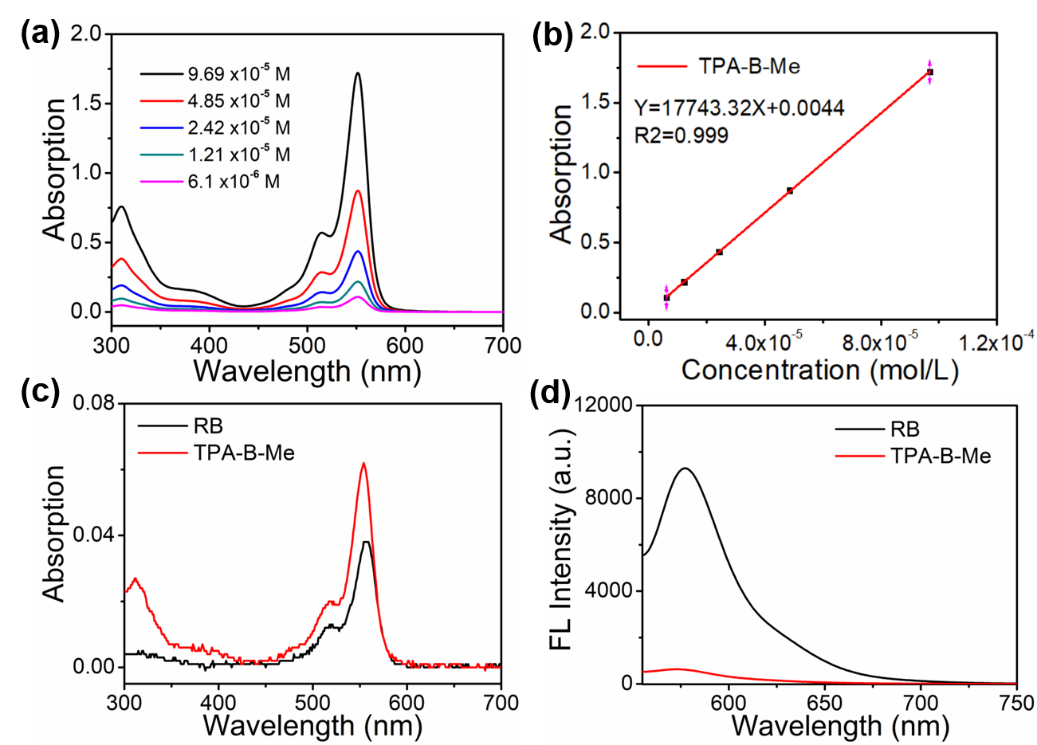


**Fig. S2**. Absorption spectra of TPA-B-Me with different concentration (a). Linear relationship between the intensity of absorption peak at 572 nm

and different concentrations of TPA-B-Me (b). Absorption(c) and fluorescence(d) spectra of TPA-B-Me and Rose Bengal in MeOH.


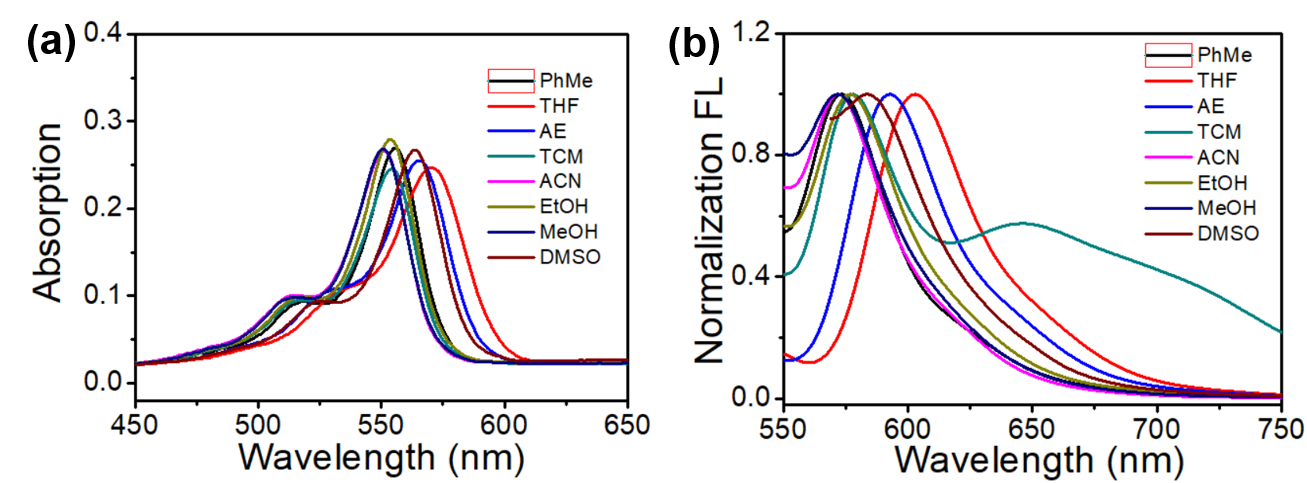


**Fig. S3**. Absorption(a) and fluorescence(b) spectra of TPA-B-Me in different solvent.





**Fig. S4**. Fluorescence spectra of TPA-B-Me in the mixed solvent of ACN/PBS with various ratio.


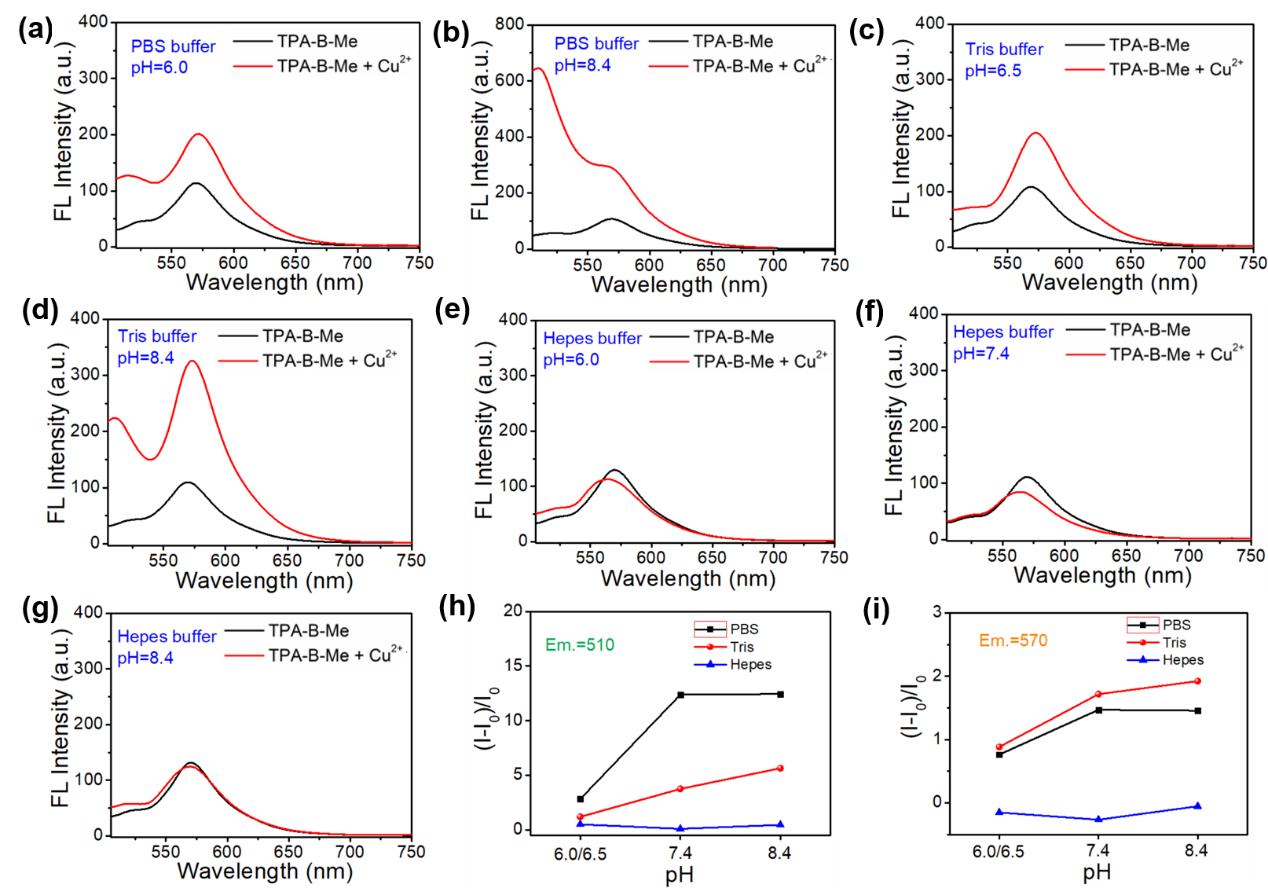


**Fig. S5**. Upon the addition of Cu2+, the fluorescence change of TPA-B-Me in PBS, Tris and Hepes system with different pH (a-g). Upon the addition of Cu2+, (I-I0)/I0 value of TPA-B-Me at 510 nm(h) and 572 nm(i) in PBS, Tris and Hepes system with different pH.


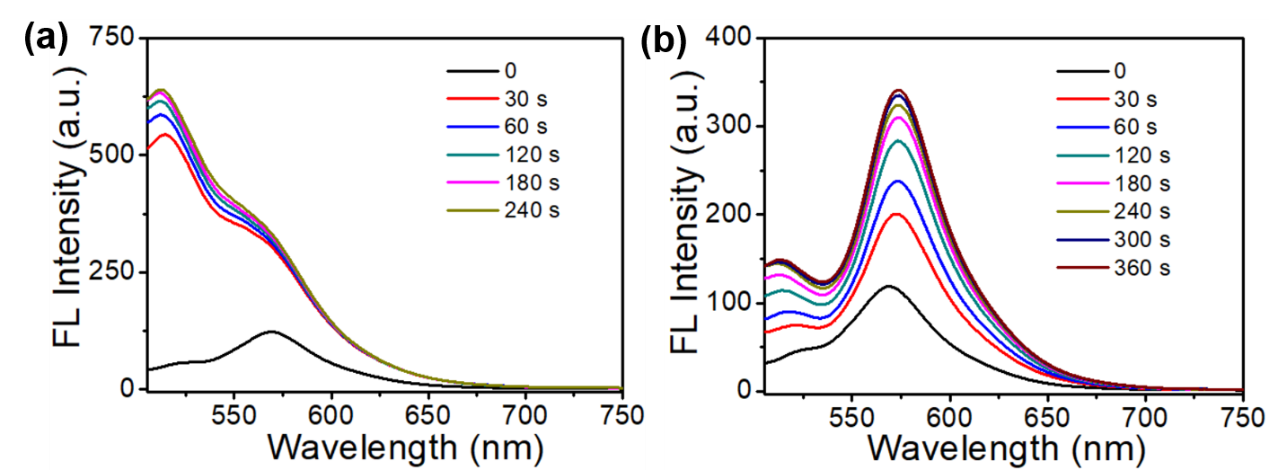


**Fig. S6**. Upon the addition of Cu2+ (20 μM), time-dependent fluorescence change of TPA-B-Me.


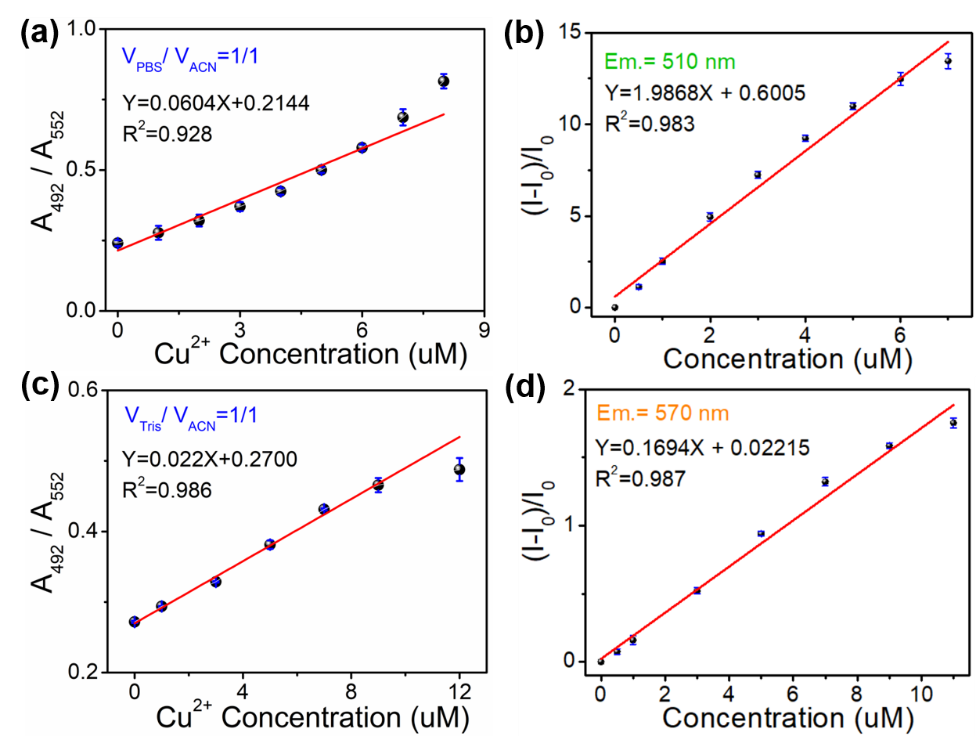


**Fig. S7**. Linear relationship between the absorption and fluorescence change of TPA-B-Me and the different concentrations of Cu2+ in the mixed solvent of ACN/PBS buffer (a, b) and ACN/Tris buffer (c, d), respectively.


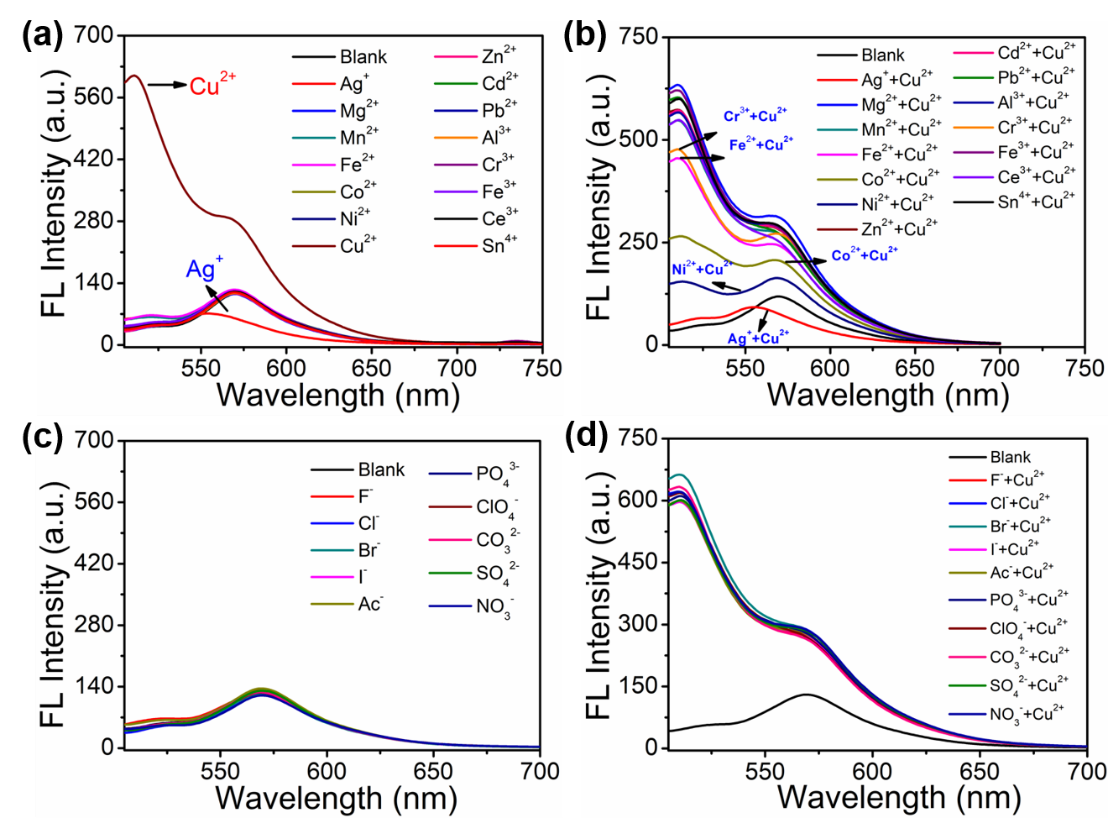


**Fig. S8**. Upon the addition of different analytes (50 μM), the fluorescence change of TPA-B-Me in PBS system (a, c). Fluorescence change of TPA-B-Me with different foreign species (50 μM) when Cu2+ (7 μM) was added (b, d).


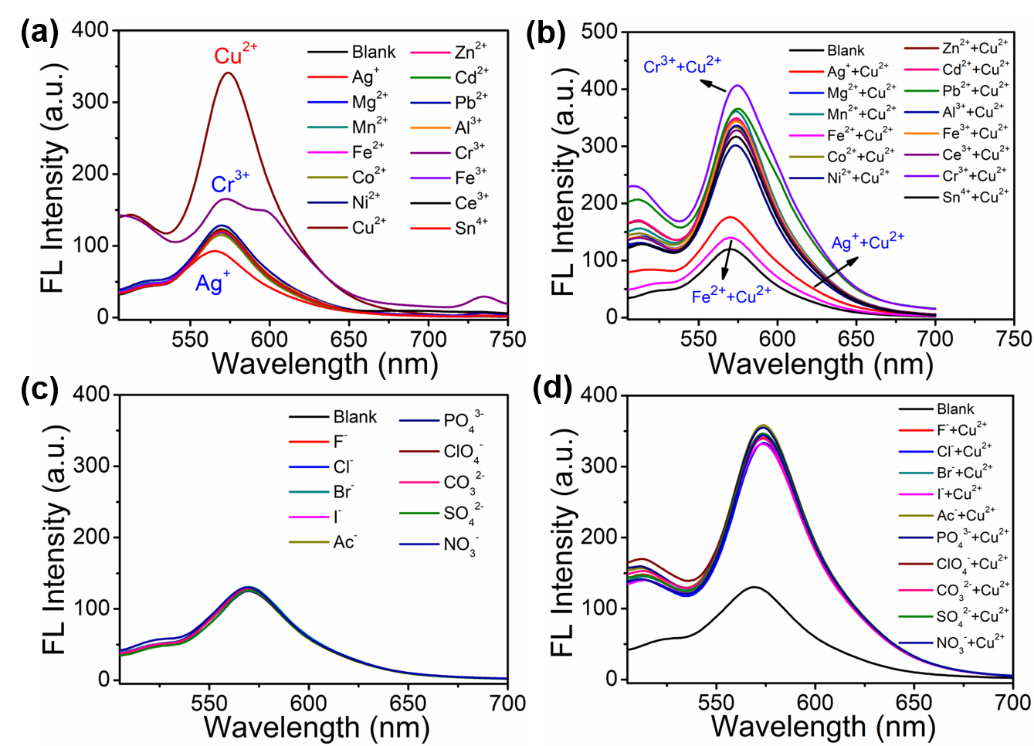


**Fig. S9**. Upon the addition of different analytes (50 μM), the fluorescence change of TPA-B-Me in Tris system (a, c). Fluorescence change of TPA-B-Me with different foreign species (50 μM) when Cu2+ (13 μM) was added (b, d).


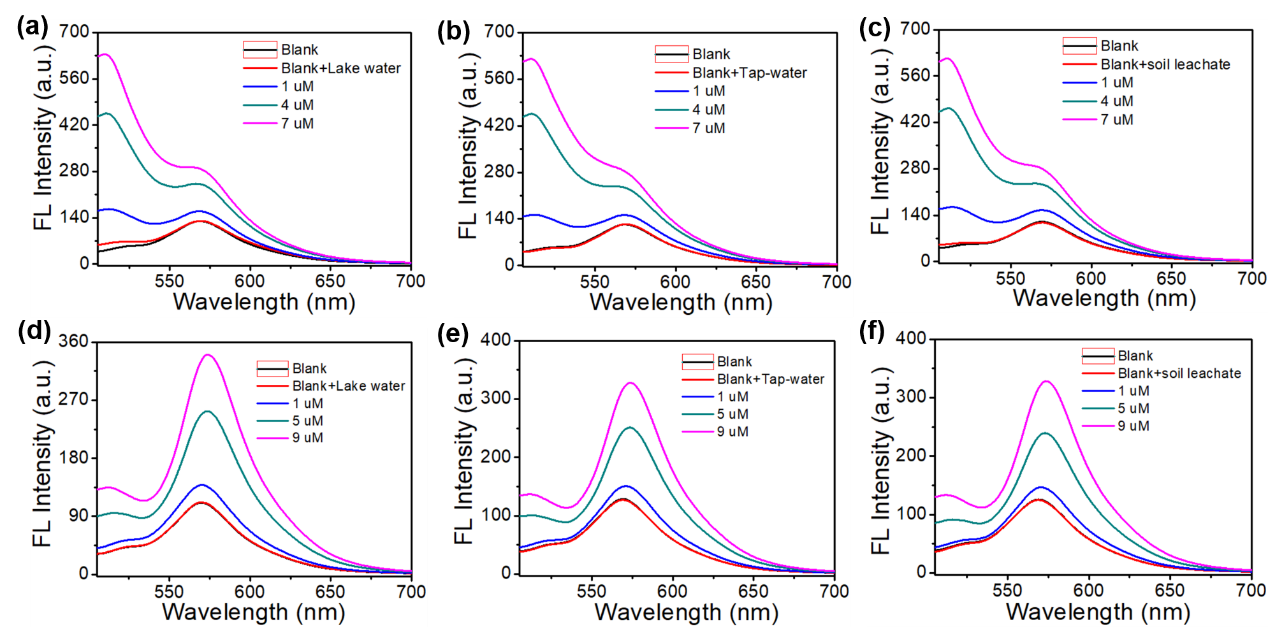


**Fig. S10**. Fluorescence spectra of TPA-B-Me of different concentrations of Cu2+ in lake water (a, d), tap water (b, e), and soil leachate (c, f).

**Table S1.** Photophysical parameters of TPA-B-Me.

| Sample | λAbs. (nm) a | λEm. (nm) b | ε (M-1cm-1) c | Φf (%) d |
| --- | --- | --- | --- | --- |
| TPA-B-Me | 552 | 577 | 17743.32 | 0.48 |

aMaximum absorbance wavelength in ACN. bMaximum emission wavelength in ACN. cMass absorption coefficient in ACN. dFluorescence quantum yield; Taking Rose Bengal in MeOH as the reference (Φf = 10%).
